# Supplementary material for: UV-absorbing benzamide-based dendrimer precursors: synthesis, theoretical calculation, and spectroscopic characterization
Source: Royal Society of Chemistry journal article supplement (doi:10.1039/d1nj04366h), 2021-11-17
Supplement: d1nj04366h1.pdf [file d1nj04366h1.pdf]

## **UV-absorbing benzamide-based dendrimer precursors: synthesis, theoretical calculation, and spectroscopic characterization**

Chidera C. Nnadi<sup>a</sup>, Ahmed Nada<sup>a</sup>, Ismail Abdulazeez<sup>b</sup>, Mohammad R. Imam<sup>c</sup>, Muhammad Ramzan Saeed Ashraf Janjua<sup>a</sup>, Abdulaziz A. Al-Saadi\*<sup>a,d</sup>

<sup>a</sup>*Chemistry Department, King Fahd University of Petroleum and Minerals, Dhahran 31261, Saudi Arabia.*

<sup>b</sup>*Interdisciplinary Research Center for Membranes & Water Security, King Fahd University of Petroleum and Minerals, Dhahran 31261, Saudi Arabia.*

<sup>c</sup>*Medical Sciences Department, American University of Iraq, Sulaimani, Kurdistan Region, Iraq 46001.*

<sup>d</sup>*Interdisciplinary Research Center for Refining & Advanced Chemicals, King Fahd University of Petroleum and Minerals, Dhahran 31261, Saudi Arabia.*

\* Corresponding author: A.A. Al-Saadi ([asaadi@kfupm.edu.sa](mailto:asaadi@kfupm.edu.sa))

### **Supplementary Information**

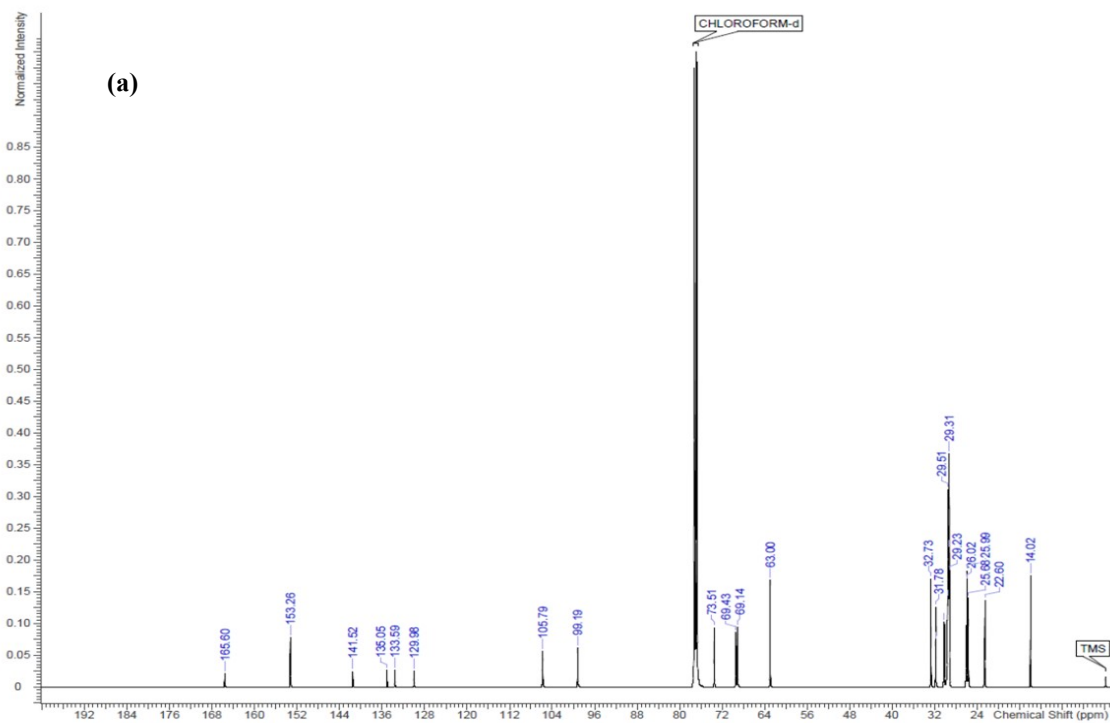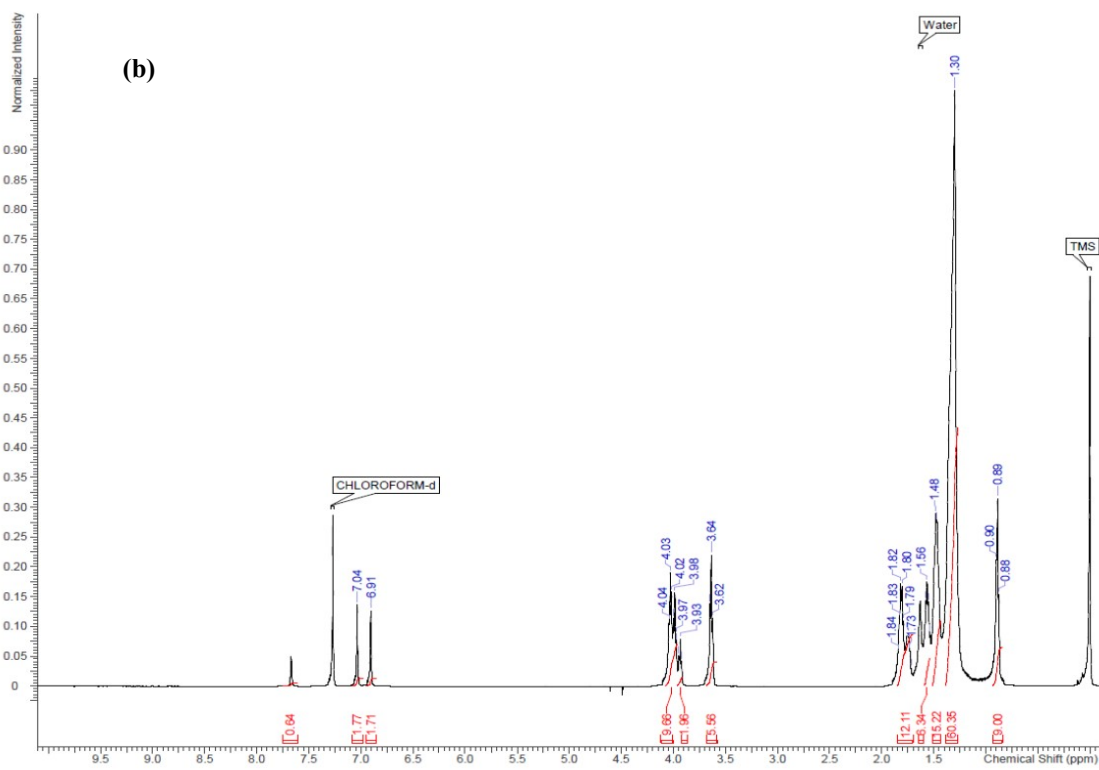

Figure S1: (a)  $^{13}\text{C}$ -NMR and (b)  $^1\text{H}$ -NMR spectra of the Janus (**J1**) benzamide structure.

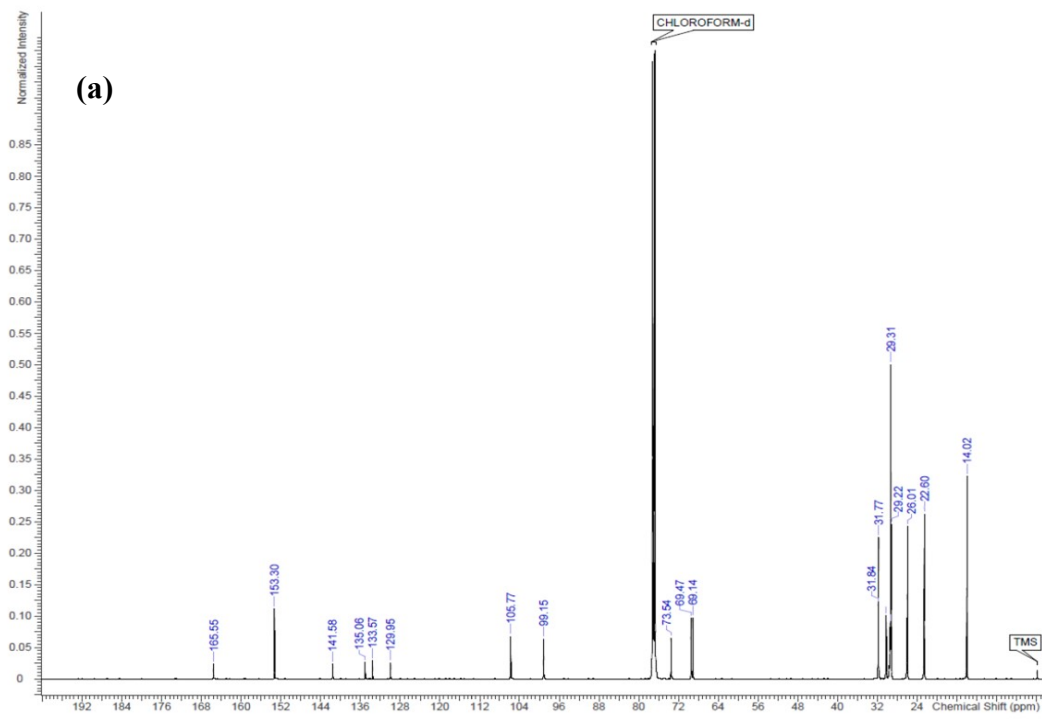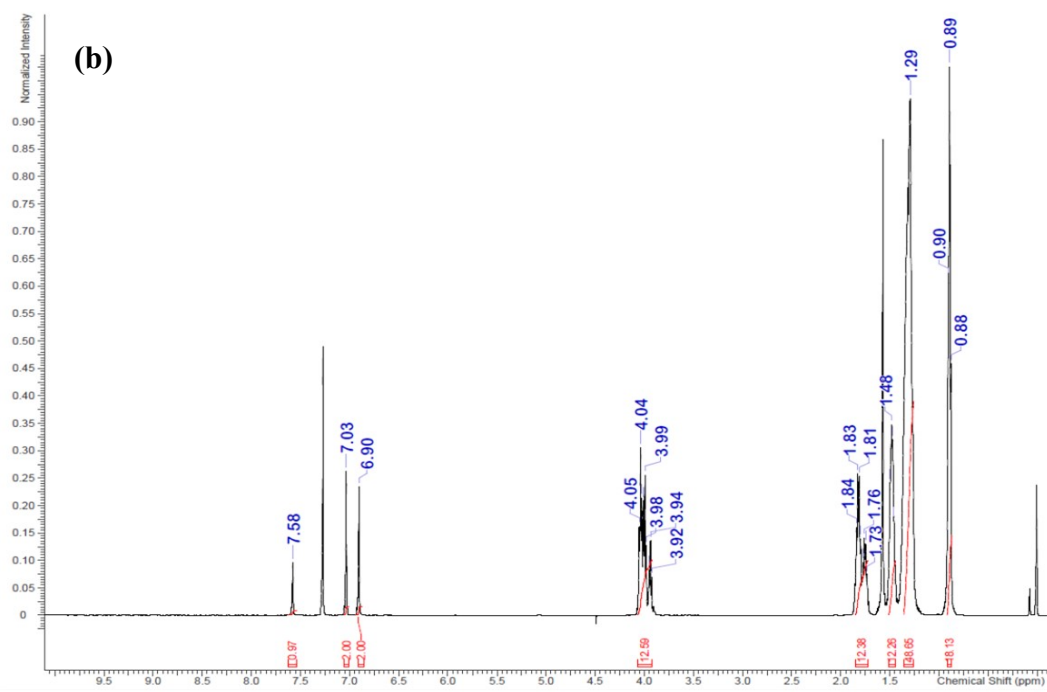

**Figure S2:** (a)  $^{13}\text{C}$ -NMR and (b)  $^1\text{H}$ -NMR spectra of the Twin (**T1**) benzamide structure.

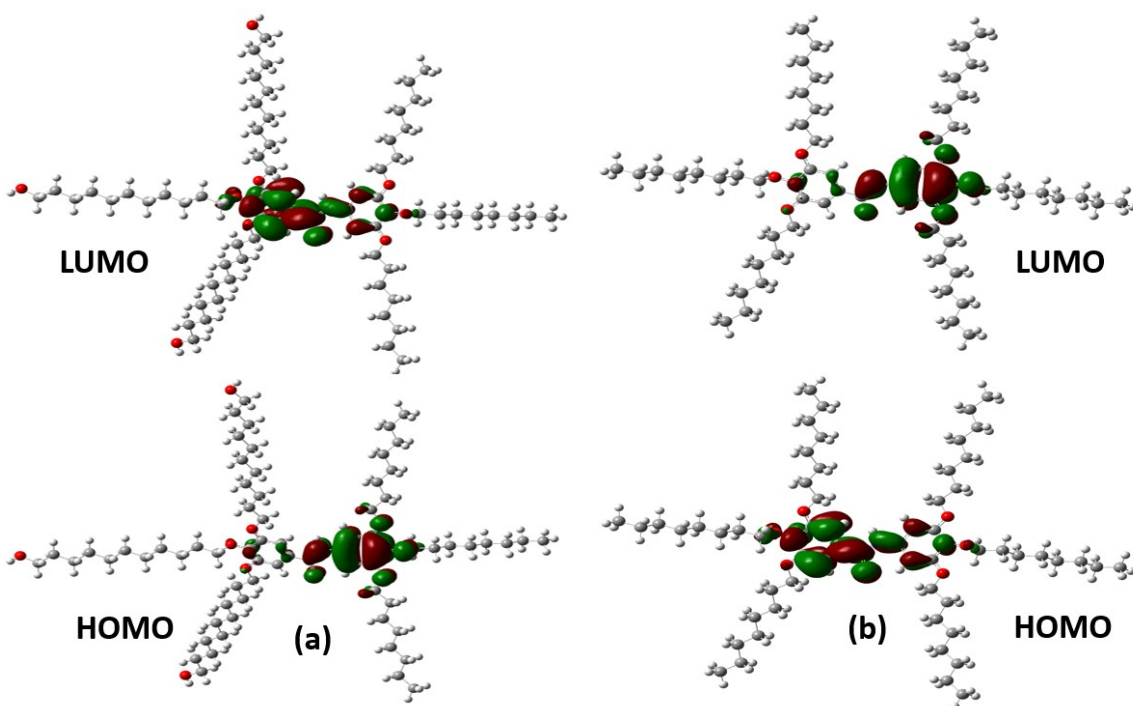

**Figure S3:** Frontier orbitals of (a) Janus (**J1**) and (b) Twin (**T1**) benzamide structures.

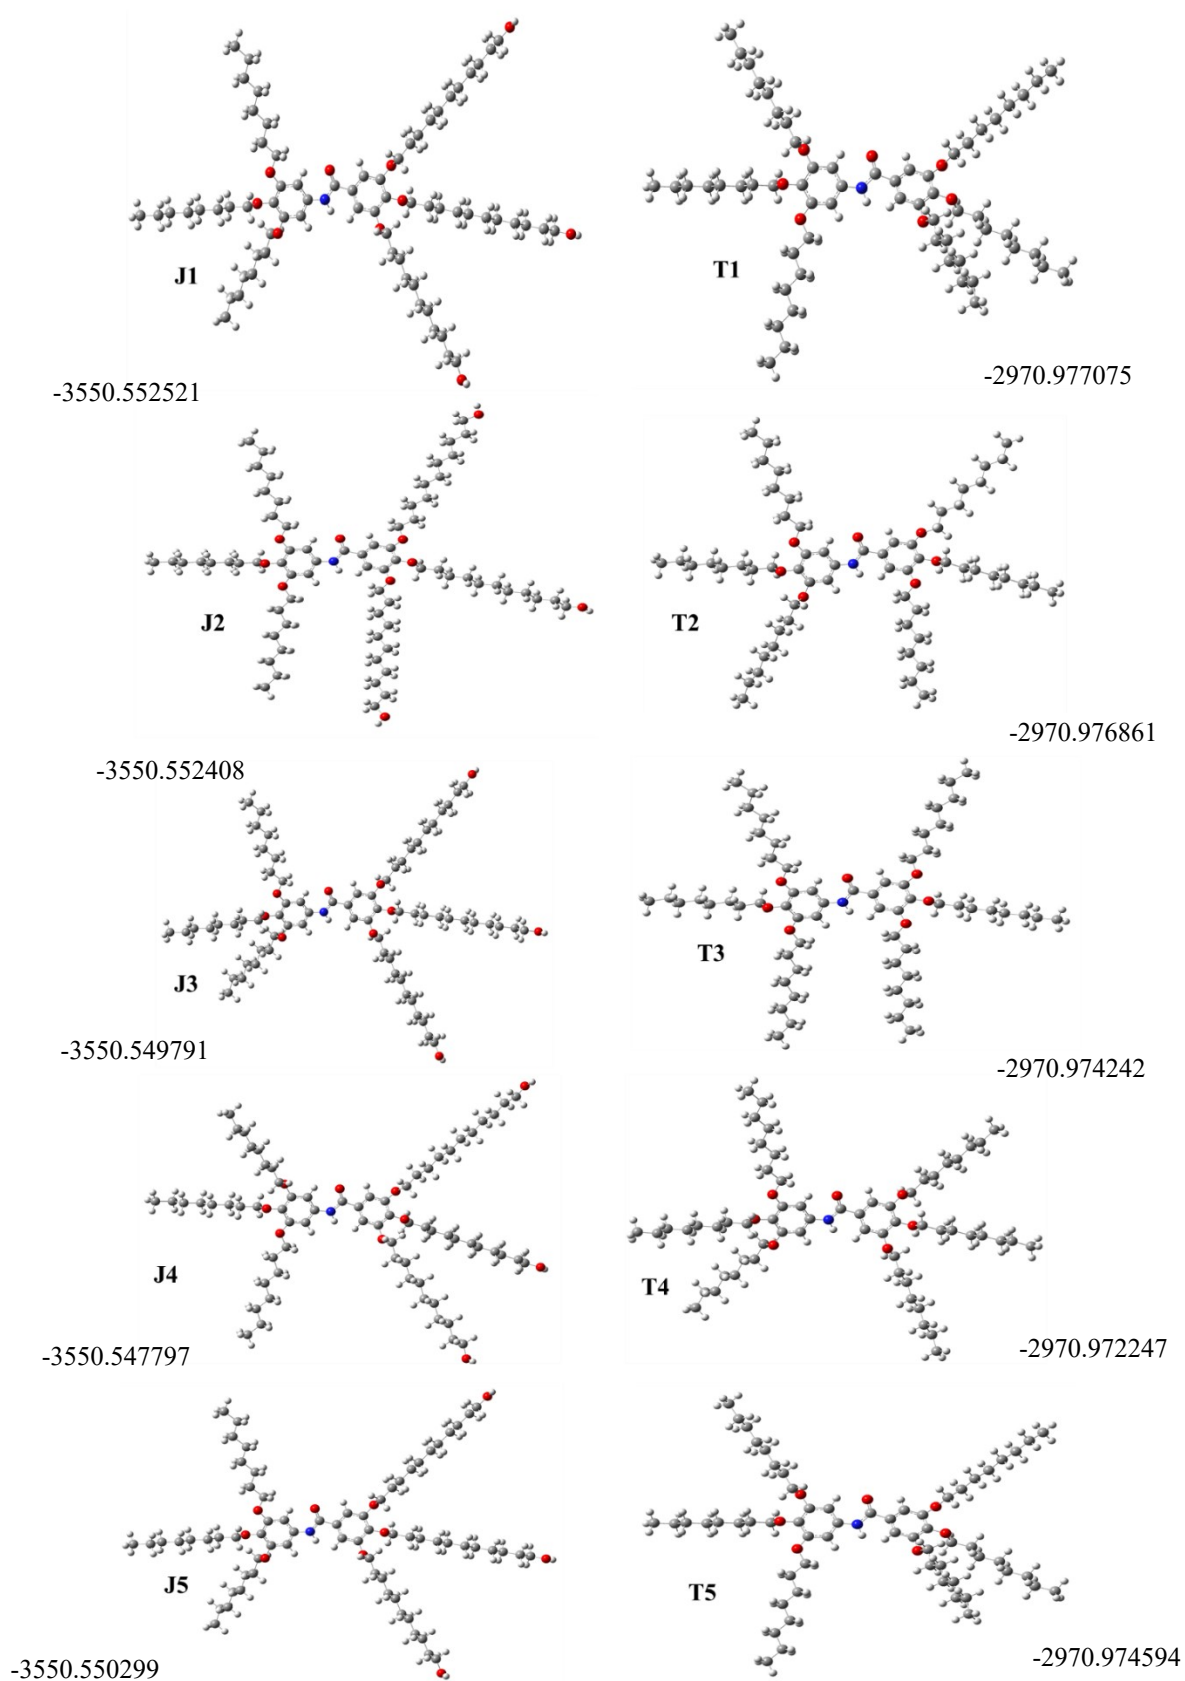

**Figure S4:** Optimized structures with their computed total energies (Hartree) of the different configurations of the Janus, denoted with the “*J*” series, and the Twin, denoted with the “*T*” series (Refer to **Table 1** for structural and stability details).

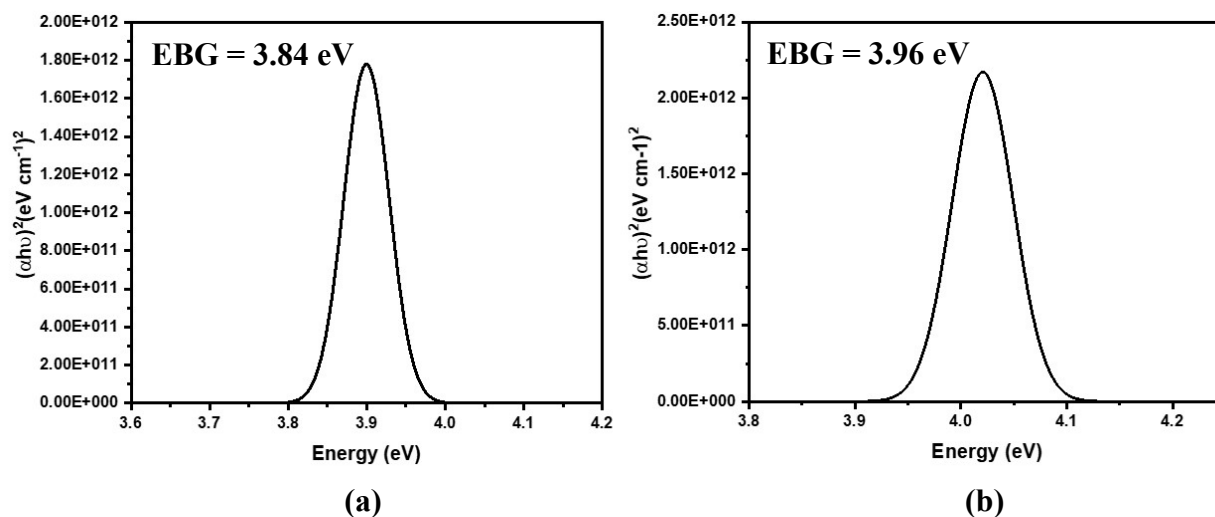

**Figure S5:** Theoretical UV-Vis energy gaps for (a) Janus (**J1**), and (b) Twin (**T1**) benzamides-computed at the B3LYP level using the Tauc plot extrapolation.

**Table S1:** Selected bond distances calculated at the B3LYP/6-311G(d) level for the Janus and the Twin benzamides in their two most stable configurations.

| Bond Distances | Janus Benzamide |           | Twin Benzamide |           |
|----------------|-----------------|-----------|----------------|-----------|
|                | <i>J1</i>       | <i>J2</i> | <i>T1</i>      | <i>T2</i> |
| O(2)-C(1)      | 1.221           | 1.221     | 1.221          | 1.220     |
| C(1)-C(5)      | 1.504           | 1.504     | 1.504          | 1.503     |
| C(1)-N(3)      | 1.376           | 1.377     | 1.377          | 1.378     |
| N(3)-C(13)     | 1.411           | 1.411     | 1.411          | 1.410     |
| C(8)-O(23)     | 1.360           | 1.360     | 1.360          | 1.364     |
| O(23)-C(75)    | 1.426           | 1.426     | 1.426          | 1.428     |
| C(12)-O(22)    | 1.365           | 1.364     | 1.364          | 1.370     |
| O(22)-C(51)    | 1.439           | 1.438     | 1.438          | 1.442     |
| C(10)-O(21)    | 1.359           | 1.359     | 1.359          | 1.362     |
| O(21)-C(27)    | 1.430           | 1.430     | 1.430          | 1.437     |
| C(18)-O(24)    | 1.362           | 1.362     | 1.362          | 1.373     |
| O(24)-C(147)   | 1.424           | 1.424     | 1.424          | 1.440     |

|              |       |       |       |       |
|--------------|-------|-------|-------|-------|
| C(20)-O(25)  | 1.369 | 1.369 | 1.369 | 1.373 |
| O(25)-C(123) | 1.435 | 1.435 | 1.435 | 1.439 |
| C(16)-O(26)  | 1.360 | 1.360 | 1.360 | 1.360 |
| O(26)-C(99)  | 1.429 | 1.429 | 1.429 | 1.430 |

**Table S2:** Selected bond angles calculated at the B3LYP/6-311G(d) level for the Janus and the Twin benzamides in their two most stable configurations.

| <b>Bond Angles</b>   | <b>Janus Benzamide</b> |           | <b>Twin Benzamide</b> |           |
|----------------------|------------------------|-----------|-----------------------|-----------|
|                      | <i>J1</i>              | <i>J2</i> | <i>T1</i>             | <i>T2</i> |
| O(2)-C(1)-N(3)       | 123.858                | 123.844   | 123.931               | 123.890   |
| O(2)-C(1)-C(5)       | 121.415                | 121.464   | 121.744               | 121.457   |
| C(1)-N(3)-C(13)      | 129.236                | 129.234   | 129.224               | 129.240   |
| C(5)-C(1)-N(3)       | 114.722                | 114.686   | 114.320               | 114.646   |
| C(8)-O(23)-C(75)     | 119.100                | 118.930   | 119.192               | 118.997   |
| C(12)-O(22)-C(51)    | 115.013                | 115.815   | 117.346               | 115.602   |
| C(10)-O(21)-C(27)    | 118.808                | 118.698   | 121.473               | 118.700   |
| C(16)-O(26)-C(99)    | 118.755                | 118.810   | 118.956               | 118.799   |
| C(18)-O(24)-C(147)   | 119.196                | 119.020   | 116.005               | 118.992   |
| C(20)-O(25)-C(123)   | 115.236                | 115.150   | 115.002               | 115.232   |
| C(195)-C(198)-O(205) | 107.891                | 107.899   | -                     | -         |
| C(186)-C(189)-O(201) | 107.915                | 107.918   | -                     | -         |
| C(177)-C(180)-O(203) | 107.919                | 107.901   | -                     | -         |

**Table S3:** The dihedral angles of the different configurations of the Janus and Twin benzamide systems.

| <b>Dihedral Angles</b>   | <b>Janus Benzamide</b> |                  | <b>Janus Benzamide</b> |                  |
|--------------------------|------------------------|------------------|------------------------|------------------|
|                          | <b><i>J1</i></b>       | <b><i>J2</i></b> | <b><i>T1</i></b>       | <b><i>T2</i></b> |
| C(15)-C(18)-O(24)-C(147) | 2.955                  | 3.302            | 111.212                | 2.433            |
| C(20)-C(18)-O(24)-C(147) | -176.834               | -176.433         | -71.049                | -177.386         |
| C(18)-C(20)-O(25)-C(123) | -92.321                | -94.357          | -100.577               | -94.385          |
| C(16)-C(20)-O(25)-C(123) | 89.840                 | 87.803           | 80.867                 | 87.661           |
| C(14)-C(16)-O(26)-C(99)  | -2.134                 | -3.900           | -2.122                 | -1.719           |
| C(20)-C(16)-O(26)-C(99)  | 177.778                | 176.081          | 178.545                | 178.258          |
| O(2)-C(1)-N(3)-C(13)     | -3.800                 | -3.341           | -2.852                 | -3.389           |
| C(13)-N(3)-C(1)-C(5)     | 176.929                | 177.508          | 177.825                | 177.462          |
| O(2)-C(1)-N(3)-C(5)      | 179.269                | 179.150          | 179.321                | 179.147          |
| C(6)-C(8)-O(23)-C(75)    | 5.357                  | -1.240           | 4.536                  | 4.012            |
| C(12)-C(8)-O(23)-C(75)   | -175.357               | 178.023          | -174.674               | -176.550         |
| C(8)-C(12)-O(22)-C(51)   | -95.561                | 97.128           | -68.573                | -96.474          |
| C(10)-C(12)-O(22)-C(51)  | 85.515                 | -86.082          | 116.471                | 85.043           |
| C(12)-C(10)-O(21)-C(27)  | 177.048                | -177.168         | -40.759                | 178.258          |
| C(7)-C(10)-O(21)-C(27)   | -2.952                 | 2.586            | 142.952                | -1.696           |
